# Supplementary material for: Impact of COVID-19 on Pregnancy Outcomes across Trimesters in the United States
Source: MDPI journal article supplement (doi:10.3390/biomedicines11112886), 2023-10-25
Supplement: s1 [file s1]

| <b>Supplementary Table S1: ICD 10 codes</b>                                  |                                                                                                                                |
|------------------------------------------------------------------------------|--------------------------------------------------------------------------------------------------------------------------------|
| <b>Variable</b>                                                              | <b>ICD-10 CM code</b>                                                                                                          |
| Covid-19                                                                     | U071, U00, U49, U50, U85, J1282                                                                                                |
| AKI                                                                          | N17.XX, N99.0                                                                                                                  |
| First Trimester                                                              | Z3A.0, Z3A.10 - Z3A.13                                                                                                         |
| Second Trimester                                                             | Z3A.14 - Z3A.27                                                                                                                |
| Third Trimester                                                              | Z3A.28, Z3A.29, Z3A.3, Z3A.4                                                                                                   |
| Cardiac arrest                                                               | I46.XX, I49.0XX, I97.12XX, I97.71XX                                                                                            |
| Smoking                                                                      | F17.XX, Z87.891                                                                                                                |
| Gestational HTN                                                              | O13.XX                                                                                                                         |
| Gestational DM                                                               | O24.4XX                                                                                                                        |
| Preeclampsia                                                                 | O11.XX, O14.OX, O14.1X, O14.9X                                                                                                 |
| Eclampsia                                                                    | O15.XX                                                                                                                         |
| HELLP                                                                        | O14.2                                                                                                                          |
| Preterm labor                                                                | O60.XX                                                                                                                         |
| Threatened abortion                                                          | O20.0XX                                                                                                                        |
| Missed abortion                                                              | O02.1XX                                                                                                                        |
| Spontaneous abortion                                                         | O03.XX                                                                                                                         |
| Molar pregnancy                                                              | O01.XX                                                                                                                         |
| Ectopic pregnancy                                                            | O00.XX                                                                                                                         |
| VTE                                                                          | I82.4XX, I82.6XX, I82.B1X, I82.A1X, I82.C1X, I26.XX, I82.0, I82.1, I82.210, I82.220, I82.290, I82.3X, I82.890, I82.90, I82.81X |
| HTN, DM, CKD, CAD, Collagen vascular disorders, Obesity, alcohol, drug abuse | Elixhauser comorbidities were used                                                                                             |
| <b>Variable</b>                                                              | <b>ICD-10 procedure code</b>                                                                                                   |
| Intubation                                                                   | 5A1945Z, 5A1955Z, 5A1935Z, 5A09357, 5A09457, 5A09557                                                                           |
| Vasopressor use                                                              | 3E030XZ, 3E033XZ, 3E040XZ, 3E043XZ, 3E050XZ, 3E053XZ, 3E060XZ, 3E063XZ                                                         |
| Hemodialysis                                                                 | 5A1D70Z, 5A1D90Z, 5A1D80Z, 5A1D00Z, 5A1D60Z                                                                                    |

| <b>Supplemental Table S2: Most common reason for admission (COVID negative 1<sup>st</sup> trimester)</b> |               |
|----------------------------------------------------------------------------------------------------------|---------------|
| Diagnosis                                                                                                | N (%)         |
| 1. Hyperemesis gravidarum with metabolic disturbance                                                     | 5530 (14.35%) |
| 2. Mild hyperemesis gravidarum                                                                           | 3640 (9.44%)  |
| 3. Mental disorders complicating pregnancy                                                               | 1825 (4.73%)  |
| 4. Diseases of the digestive system complicating pregnancy                                               | 1395 (3.62%)  |
| 5. Infections of kidney in pregnancy                                                                     | 1276 (3.36%)  |
| 6. Maternal infectious and parasitic diseases complicating pregnancy                                     | 1011 (2.62%)  |
| 7. Maternal care for low transverse scar from previous cesarean delivery                                 | 955 (2.47%)   |
| 8. Drug use complicating pregnancy                                                                       | 741 (1.92%)   |
| 9. Injury, poisoning and certain other consequences of external causes complicating pregnancy            | 739 (1.91%)   |
| 10. Pre-existing type 2 diabetes mellitus, in pregnancy                                                  | 701 (1.82%)   |

| <b>Supplemental Table S3: Most common reason for admission (COVID negative 2<sup>nd</sup> trimester)</b>       |              |
|----------------------------------------------------------------------------------------------------------------|--------------|
| Diagnosis                                                                                                      | N (%)        |
| 1. Maternal care for intrauterine death                                                                        | 6125 (6.45%) |
| 2. Preterm labor                                                                                               | 5805 (6.11%) |
| 3. Infections of kidney in pregnancy                                                                           | 5630 (5.93%) |
| 4. Missed abortion                                                                                             | 5065 (5.33%) |
| 5. Preterm premature rupture of membranes, unspecified as to length of time between rupture and onset of labor | 4940 (5.2%)  |
| 6. Maternal care for cervical incompetence                                                                     | 3565 (3.75%) |
| 7. Preterm labor without delivery                                                                              | 3175 (3.34%) |
| 8. Cervical shortening                                                                                         | 2805 (2.95%) |
| 9. Diseases of the digestive system complicating pregnancy                                                     | 2501 (2.63%) |
| 10. Preterm premature rupture of membranes, onset of labor more than 24 hours following rupture                | 2306 (2.43%) |

| <b>Supplemental Table S4: Most common reason for admission (COVID negative 3<sup>rd</sup> trimester)</b> |                 |
|----------------------------------------------------------------------------------------------------------|-----------------|
| Diagnosis                                                                                                | N (%)           |
| 1. Maternal care for low transverse scar from previous cesarean                                          | 362080 (10.92%) |
| 2. Post-term pregnancy                                                                                   | 286115 (8.62%)  |
| 3. Streptococcus B carrier state complicating childbirth                                                 | 161920 (4.88%)  |
| 4. Gestational [pregnancy-induced] hypertension without significant proteinuria, complicating childbirth | 132810 (4%)     |
| 5. Abnormality in fetal heart rate and rhythm complicating labor and delivery                            | 119080 (3.59%)  |
| 6. Second degree perineal laceration during delivery                                                     | 115200 (3.47%)  |
| 7. Full-term premature rupture of membranes, onset of labor within 24                                    | 105630 (3.18%)  |
| 8. First degree perineal laceration during delivery                                                      | 101215 (3.05%)  |
| 9. Labor and delivery complicated by cord around neck, without compression                               | 97035 (2.92%)   |
| 10. Encounter for full-term uncomplicated delivery                                                       | 92270 (2.78%)   |
